# Supplementary material for: The filamentous fungus Penicillium chrysogenum analysed via flow cytometry—a fast and statistically sound insight into morphology and viability
Source: PubMed Central journal article supplement (PMC6667401; doi:10.1007/s00253-019-09943-4), 2019-06-19
Supplement: 253_2019_9943_MOESM1_ESM.pdf [file 253_2019_9943_MOESM1_ESM.pdf]

Supplementary Material for

**The filamentous fungus *Penicillium chrysogenum* analysed via flow cytometry - a fast and statistically sound insight into morphology and viability**

Lukas Veiter<sup>1,2</sup> and Christoph Herwig<sup>\*,1,2</sup>

\*to whom the correspondence should be addressed to

<sup>1</sup> CD Laboratory on Mechanistic and Physiological Methods for Improved Bioprocesses, Vienna University of Technology, Gumpendorferstrasse 1a/166, 1060 Vienna, Austria

<sup>2</sup> Research Area Biochemical Engineering, Institute of Chemical, Environmental and Bioscience Engineering, Vienna University of Technology, Gumpendorferstrasse 1a/166, 1060 Vienna, Austria

\*Corresponding author:

christoph.herwig@tuwien.ac.at; Tel (Office): +43 1 58801 166400

Gumpendorferstrasse 1a / 166-4

1060 Wien, Austria

**Journal: “Applied Microbiology and Biotechnology”**

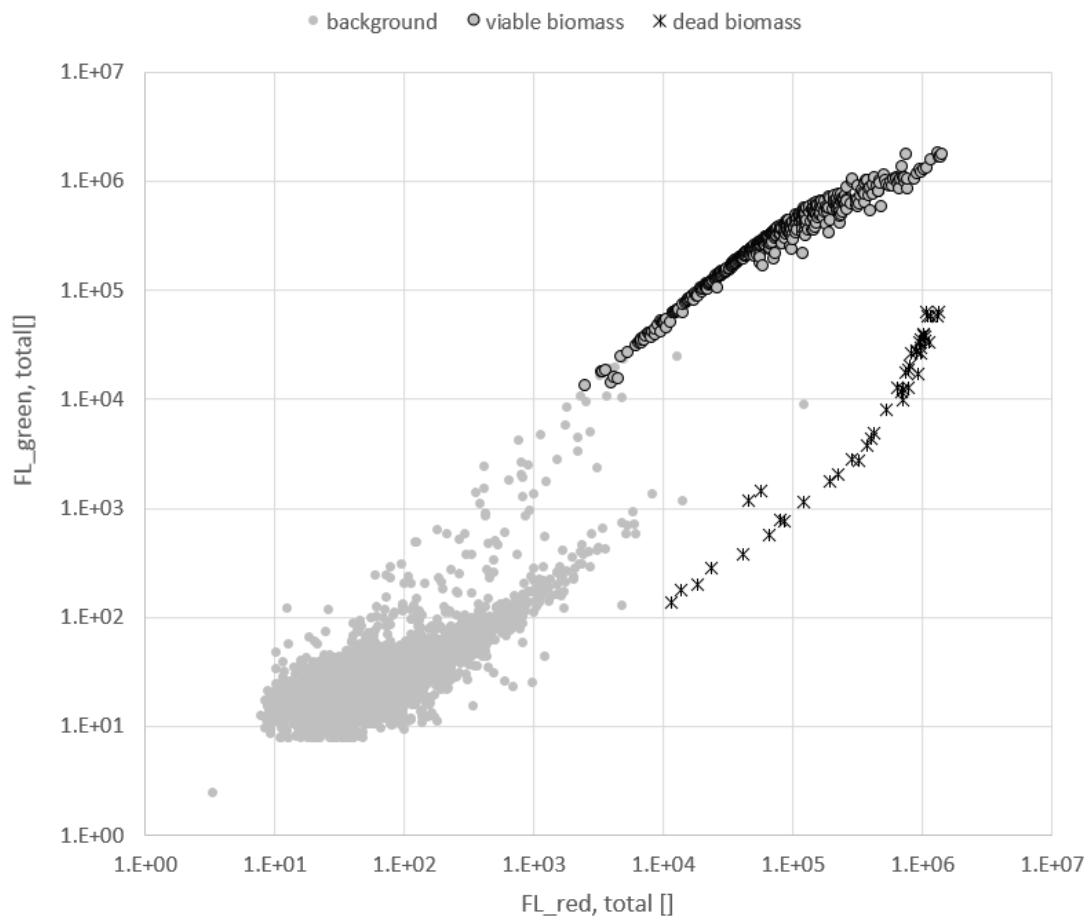

**Figure S1.** Sample from FB2 fed-batch phase 80h after transfer with overall viability of 90 % measured via flow cytometry and confirmed by plate reader staining measurements. Differentiation between complex media background, viable and dead biomass through gate setting employing fluorescent staining with FDA/PI. Viable biomass (framed circles), dead biomass (framed triangles) and background (grey circles).

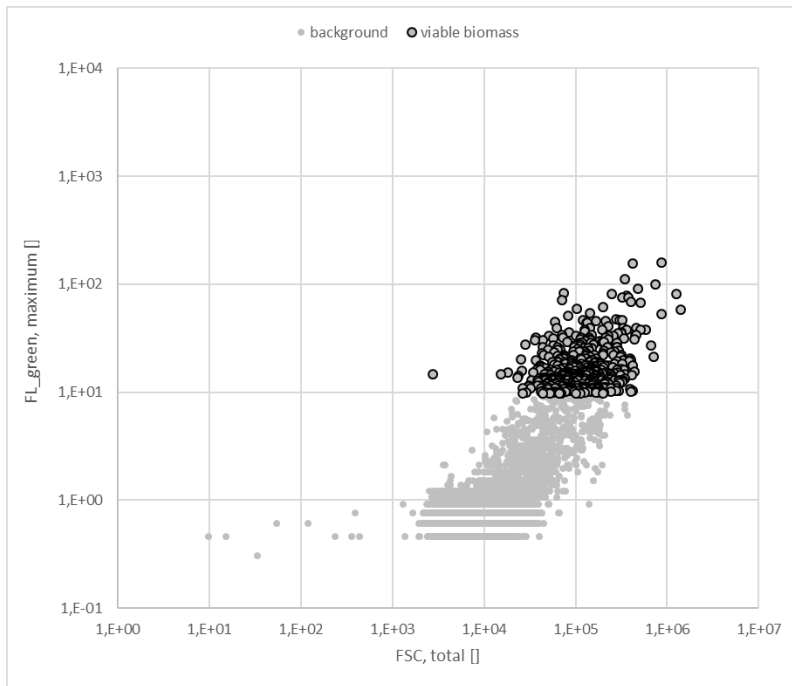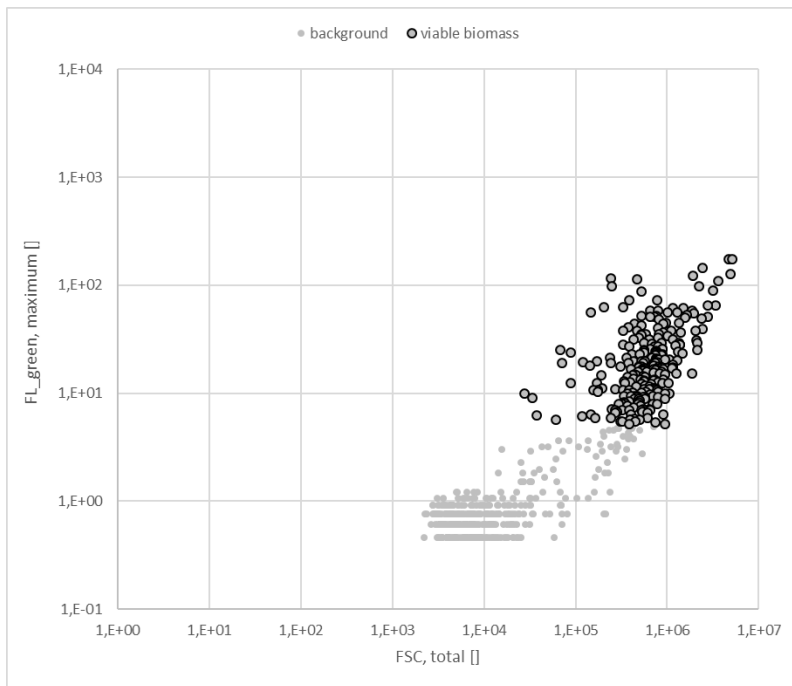

**Figure S2.** Comparison of biomass differentiation in different media without the use of fluorescent staining. High media particle content (top), low media particle content (bottom).

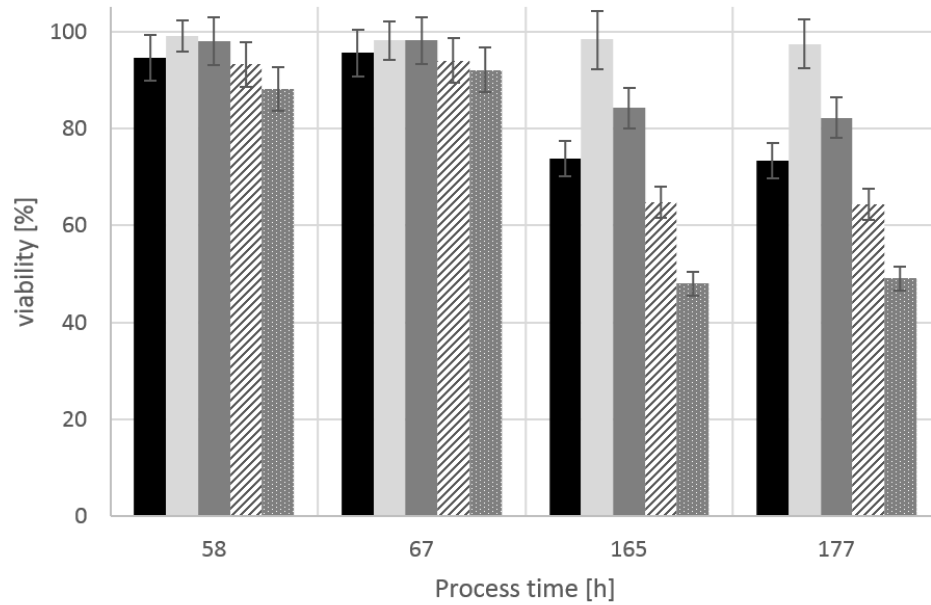

**Figure S3.** Viability determination via flow cytometry. Overall viability (black bars) at different process times subdivided into different morphological classes: hyphae (light grey bars), small clumps (dark grey bars), large clumps (patterned bars), pellets (dotted bars). Data from FB1 displaying beginning and end of fed-batch cultivation phase.
